# Supplementary material for: Structural investigation of oxidized arabinoxylan oligosaccharides by negative ionization HILIC-qToF-MS
Source: Royal Society of Chemistry journal article supplement (doi:10.1039/d0an01110j), 2020-01-01

# 1 Supplementary information

2 Figure S 1: MS<sup>2</sup> spectra of isomeric xylonic acid oxidation products with m/z of 561.17 and 429.12, obtained by  
3 TEMPO-mediated oxidation of the respective native (A)XOS.

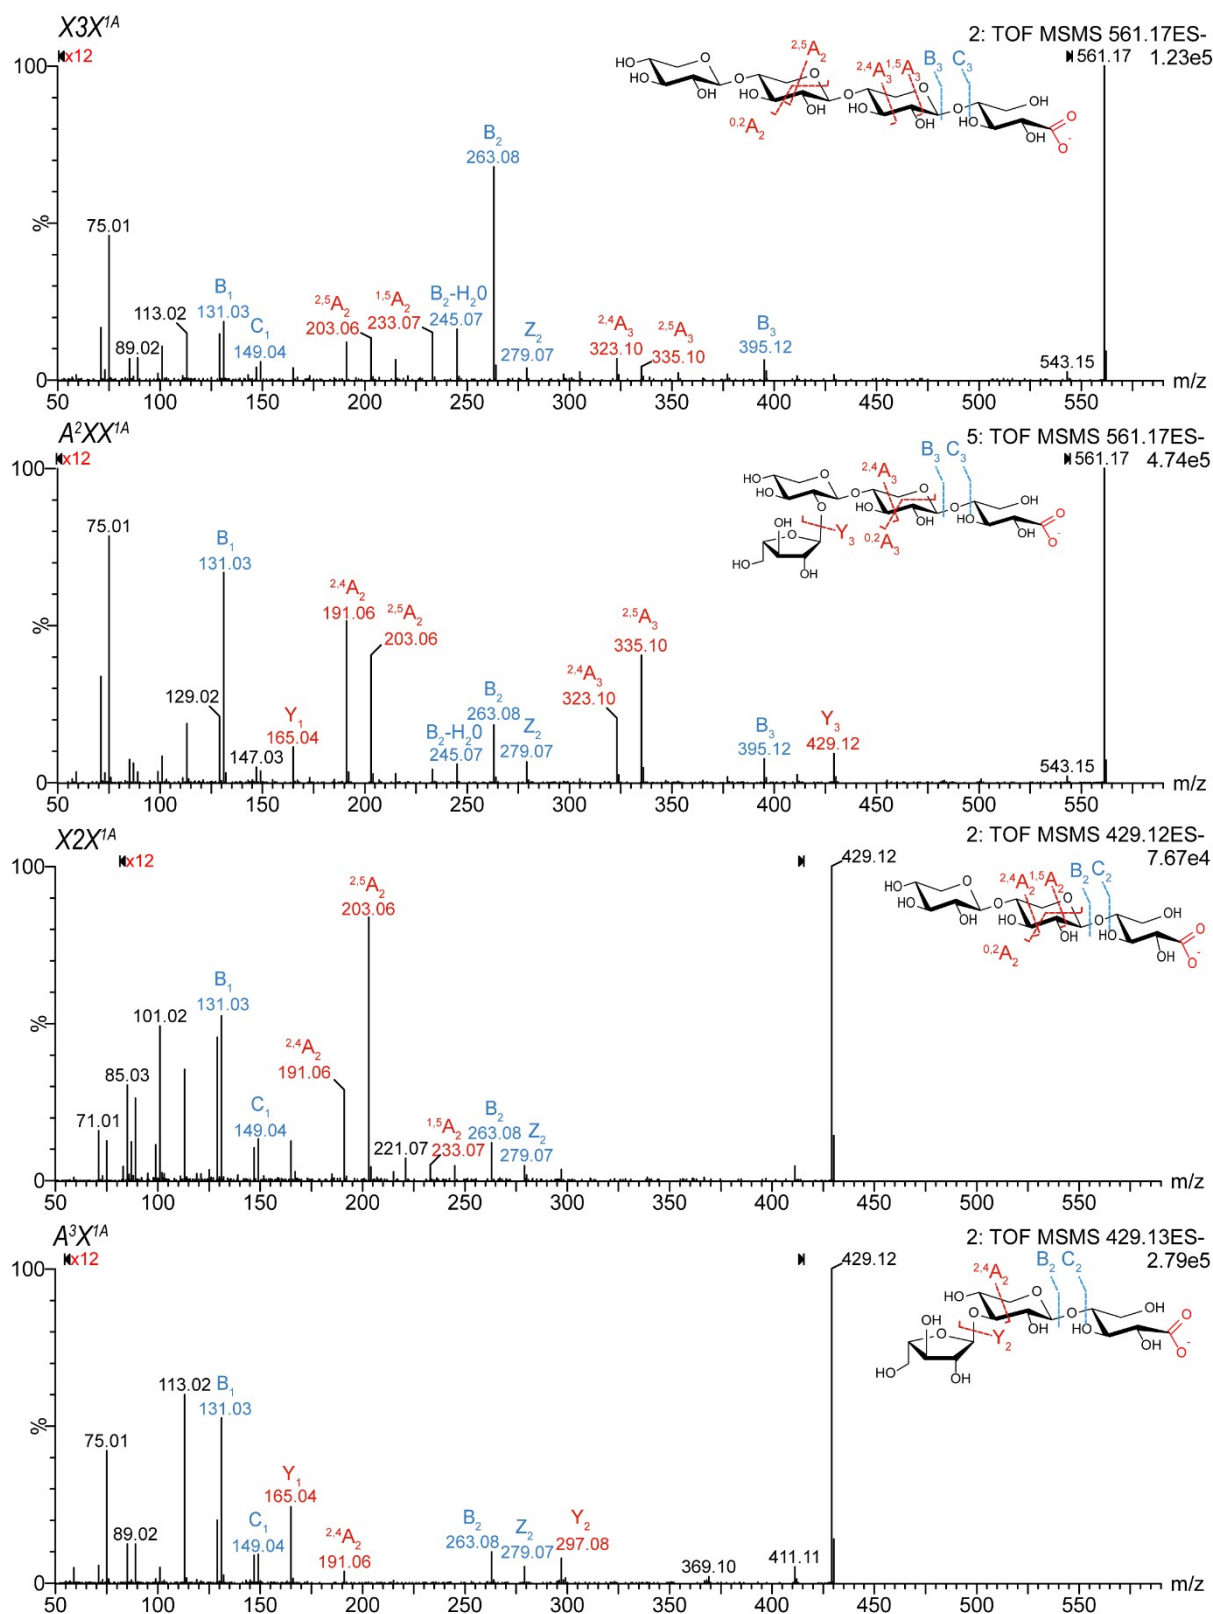

5 Figure S 2: BPI of oligosaccharide mixture with the respective elution times recorded in Gradient I.

*Gradient I (0.1% NH<sub>3</sub>) BPI oligosaccharide mixture*

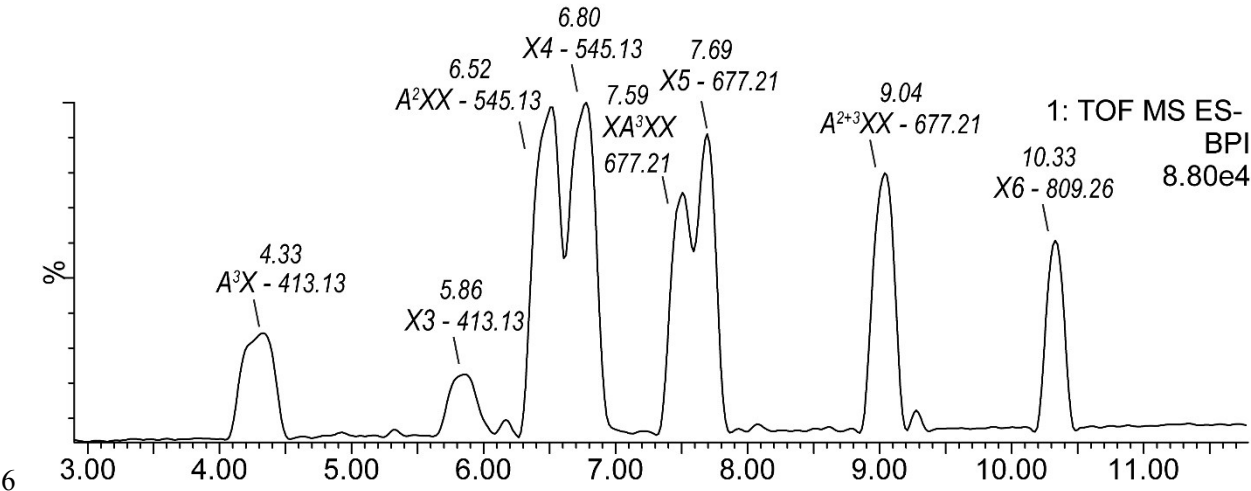

Supplement: d0an01110j1.pdf [file d0an01110j1.pdf]
